# Supplementary material
Source: publisher figshare collection journal article supplement (https://gsapubs.figshare.com/ndownloader/files/22756163)
Supplement: Supplementary file 1 [file 22756163]

## GSA Data Repository Item 2005141

*From:* Haxel, G.B., Wright, J.E., Riggs, N.R., Tosdal, R.M., and May, D.J., 2005, Middle Jurassic Topawa Group, Baboquivari Mountains, south-central Arizona: Volcanic and sedimentary record of deep basins within the Jurassic magmatic arc, *in* Anderson, T.H., Nourse, J.A., McKee, J.W., and Steiner, M.B., eds., The Mojave-Sonora megashear hypothesis: Development, assessment, and alternatives: Geological Society of America Special Paper 393, doi: 10.1130/2005.2393(12).

### **APPENDIX: U-Pb ISOTOPIC DATA DETERMINED BY THERMAL-IONIZATION MASS SPECTROMETRY**

We first reported U-Pb inferred ages for the Topawa Group in an abstract in 1981 (Wright et al., 1981; see also Tosdal et al., 1989; Riggs and Haxel, 1990). These geochronologic data were determined on multigrain size and magnetic fractions of zircon, analyzed by thermal-ionization mass spectrometry (TIMS). Interpretation of these discordant U-Pb ages, which evidently reflect both inheritance of premagmatic zircon and postmagmatic loss of radiogenic Pb, is not straightforward (compare with Riggs et al., 1993). As explained in the main text, this problematic data set has been supplanted by a sensitive high-resolution ion microprobe (SHRIMP) U-Pb zircon age for the Ali Molina Formation, determined in 2003 (Table 1).

At the request of the editors, we present here the TIMS analytical data for five fractions of zircon from the Topawa Group (Table A1, below), for the benefit of anyone who may want to compare results of the two isotopic methods. Table A1 also includes data for three fractions of zircon from the Sil Nakya Formation (Haxel et al., 1978; Bilodeau and Keith, 1986).

The samples of the rhyolite member of the Ali Molina Formation from which zircon was analyzed by TIMS and using the SHRIMP instrument were both collected from the lower part of the rhyolite member, at localities separated by 1.4 km in map distance and ~0.5 km stratigraphically. This stratigraphic separation is minor compared to the 4 km thickness of the homogeneous rhyolite member (Fig. 4). The two Ali Molina samples are very similar volcanic rhyolites characterized by pronounced relict eutaxitic foliation (Fig. 5A).

Table A1. TIMS U-Pb isotopic ratios and apparent ages of zircon from the Topawa Group and the Sil Nakya Formation, southern Arizona<sup>a</sup>

| Unit <sup>b</sup> | Sample | Size<br>fraction <sup>c</sup><br>(mesh) | Concentration<br>(μg/g) <sup>d</sup> |                    | Observed ratios <sup>e</sup>         |                                      |                                      | Atomic ratios <sup>f</sup>           |                                      |                                        | Apparent ages <sup>g</sup> (Ma)      |                                      |                                        |
|-------------------|--------|-----------------------------------------|--------------------------------------|--------------------|--------------------------------------|--------------------------------------|--------------------------------------|--------------------------------------|--------------------------------------|----------------------------------------|--------------------------------------|--------------------------------------|----------------------------------------|
|                   |        |                                         | U                                    | <sup>206</sup> Pb* | <sup>206</sup> Pb/ <sup>204</sup> Pb | <sup>207</sup> Pb/ <sup>206</sup> Pb | <sup>208</sup> Pb/ <sup>206</sup> Pb | <sup>206</sup> Pb*/ <sup>238</sup> U | <sup>207</sup> Pb*/ <sup>235</sup> U | <sup>207</sup> Pb*/ <sup>206</sup> Pb* | <sup>206</sup> Pb*/ <sup>238</sup> U | <sup>207</sup> Pb*/ <sup>235</sup> U | <sup>207</sup> Pb*/ <sup>206</sup> Pb* |
| AMF               | PUP 17 | <200                                    | 428.0                                | 9.30               | 4255                                 | 0.05335                              | 0.15818                              | 0.02528                              | 0.17398                              | 0.04990                                | 161.0                                | 162.9                                | 191                                    |
|                   |        | <200h                                   | 571.3                                | 12.44              | 2778                                 | 0.05514                              | 0.16847                              | 0.02533                              | 0.17417                              | 0.04987                                | 161.3                                | 163.0                                | 188                                    |
|                   |        | >200                                    | 357.8                                | 8.03               | 2703                                 | 0.05536                              | 0.16419                              | 0.02613                              | 0.17986                              | 0.04993                                | 166.2                                | 167.9                                | 192                                    |
| MWF               | PUP 21 | <200                                    | 649.6                                | 14.35              | 4048                                 | 0.05346                              | 0.26421                              | 0.02572                              | 0.17673                              | 0.04984                                | 163.7                                | 165.2                                | 188                                    |
|                   |        | >200                                    | 637.8                                | 14.14              | 2335                                 | 0.05627                              | 0.27929                              | 0.02581                              | 0.17762                              | 0.04992                                | 164.2                                | 166.0                                | 191                                    |
| SNF               | PUP 25 | total                                   | 433.2                                | 9.72               | 18181                                | 0.05136                              | 0.31450                              | 0.02611                              | 0.17959                              | 0.04989                                | 166.1                                | 167.7                                | 190                                    |
|                   |        | <200                                    | 447.0                                | 10.10              | 7143                                 | 0.05196                              | 0.31547                              | 0.02629                              | 0.18067                              | 0.04984                                | 167.3                                | 168.6                                | 188                                    |
|                   |        | >200                                    | 671.7                                | 15.31              | 1250                                 | 0.06155                              | 0.35850                              | 0.02653                              | 0.18229                              | 0.04984                                | 168.8                                | 170.0                                | 188                                    |

<sup>a</sup> Pb\* denotes radiogenic Pb. Analytical methods: Wright (1981).

<sup>b</sup> AMF—rhyolite member, Ali Molina Formation, Topawa Group; MWF—Mulberry Wash Formation, Topawa Group; SNF—Sil Nakya Formation.

<sup>c</sup> Analyzed zircon fractions weighed 10–25 mg.

<sup>d</sup> Estimated precision 0.25 %.

<sup>e</sup> Precision: <sup>208</sup>Pb/<sup>206</sup>Pb and <sup>207</sup>Pb/<sup>206</sup>Pb, ≤0.10 %; <sup>206</sup>Pb/<sup>204</sup>Pb, ≤1.0 %.

<sup>f</sup> As all zircon fractions yielded <sup>206</sup>Pb/<sup>204</sup>Pb measured ratios >1000, all common Pb has been ascribed to the sample processing blank. Total Pb blanks were 0.2–0.5 ng. Common Pb corrections: <sup>206</sup>Pb/<sup>204</sup>Pb = 18.6, <sup>207</sup>Pb/<sup>204</sup>Pb = 15.6, <sup>208</sup>Pb/<sup>204</sup>Pb = 38.0.

<sup>g</sup> Decay constants (Steiger and Jäger, 1977): <sup>235</sup>U, 0.98485 x 10<sup>−9</sup> yr<sup>−1</sup>; <sup>238</sup>U, 0.155125 x 10<sup>−9</sup> yr<sup>−1</sup>; <sup>238</sup>U/<sup>235</sup>U = 137.88.

<sup>h</sup> Fine fraction of the <200 mesh size fraction.

## REFERENCES CITED

- Bilodeau, W.L., and Keith, S.B., 1986, Lower Jurassic Navajo-Aztec-equivalent sandstones in southern Arizona and their paleogeographic significance: American Association of Petroleum Geologists Bulletin, v. 70, p. 690–704.
- Haxel, G.B., Briskey, J.A., Rytuba, J.J., Bergquist, J.R., Blacet, P.M., and Miller, S.T., 1978, Reconnaissance geologic map of the Comobabi Mountains 15' quadrangle, Arizona: U.S. Geological Survey Miscellaneous Field Studies Map MF-964, scale 1:62,500.
- Riggs, N.R., and Haxel, G.B., 1990, The Early to Middle Jurassic magmatic arc in southern Arizona: Plutons to sand dunes, *in* Gehrels, G.E., and Spencer, J.E., eds., Geologic excursions through the Sonoran Desert region, Arizona and Sonora: Arizona Geological Survey Special Paper 7, p. 90–103.
- Riggs, N.R., Mattinson, J.M., and Busby, C.J., 1993, Correlation of Jurassic eolian strata between the magmatic arc and the Colorado Plateau: New U-Pb geochronologic data from southern Arizona: Geological Society of America Bulletin, v. 105, p. 1231–1246, doi: 10.1130/0016-7606(1993)105<1231:COJESB>2.3.CO;2.
- Steiger, R.H., and Jäger, E., 1977, Subcommittee on geochronology: Conventions on the use of decay constants in geo- and cosmochemistry: Earth and Planetary Science Letters, v. 36, p. 359–371, doi: 10.1016/0012-821X(77)90060-7.
- Tosdal, R.M., Haxel, G.B., and Wright, J.E., 1989, Jurassic geology of the Sonoran Desert region, southern Arizona, southeastern California, and northernmost Sonora: Construction of a continental-margin magmatic arc, *in* Jenny, J.P., and Reynolds, S.J., eds., Geologic evolution of Arizona: Arizona Geological Society Digest, v. 17, p. 397–434.
- Wright, J.E., 1981, Geology and U-Pb geochronology of the western Paleozoic and Triassic subprovince, Klamath Mountains, northern California [Ph.D. dissertation]: Santa Barbara, University of California, 300 p.
- Wright, J.E., Haxel, G.B., and May, D.J., 1981, Early Jurassic uranium-lead isotopic ages for Mesozoic supracrustal sequences, Baboquivari Mountains, southern Arizona: Geological Society of America Abstracts with Programs, v. 13, p. 115.
